# Supplementary material for: Error Distribution of a 5-Axis Measuring Machine Based on Sensitivity Analysis of Geometric Errors
Source: Hindawi journal article supplement (doi:10.1155/2020/8146975), 2020-02-14
Supplement: f1 [file 8146975.f1.zip]

Archive with 8 entries (8 files):
- 8146975.f1/Sensitivity indices of geometric errors on volumetric measurement error after error distribution.xlsx
- 8146975.f1/Sensitivity indices of geometric errors on volumetric measurement error before error distribution.xlsx
- 8146975.f1/The X directional sensitivity indices of geometric errors after error distribution.xlsx
- 8146975.f1/The X directional sensitivity indices of geometric errors before error distribution.xlsx
- 8146975.f1/The Y directional sensitivity indices of geometric errors after error distribution.xlsx
- 8146975.f1/The Y directional sensitivity indices of geometric errors before error distribution.xlsx
- 8146975.f1/The Z directional sensitivity indices of geometric errors after error distribution.xlsx
- 8146975.f1/The Z directional sensitivity indices of geometric errors before error distribution.xlsx
