# Supplementary material for: Error Distribution of a 5-Axis Measuring Machine Based on Sensitivity Analysis of Geometric Errors
Source: Hindawi journal article supplement (doi:10.1155/2020/8146975), 2020-02-14
Supplement: f1 [file 8146975.f1.zip › 8146975.f1/Sensitivity indices of geometric errors on volumetric measurement error after error distribution.xlsx]

## Sheet: Sheet1
	1	2	3	4	5	6	7	8	9	10	11	12	13	14	15	16	17	Mean
1	2.5852e-07	1.5935e-07	1.65623e-07	9.42176e-08	2.33525e-07	1.70952e-07	2.11386e-07	1.39322e-07	0.000440247	2.22745e-07	1.31433e-07	2.22772e-07	1.61e-07	1.96773e-07	9.2746e-08	2.18087e-07	1.39494e-07	2.60626e-05
2	4.91751e-08	4.69374e-08	1.84571e-08	2.25384e-08	3.86491e-08	5.24685e-08	2.90032e-08	3.89169e-08	0.0002032	4.64591e-08	6.24619e-08	2.81564e-08	3.92947e-08	5.99389e-08	4.4353e-08	1.82872e-08	2.63114e-08	1.19895e-05
3	2.84809e-07	4.25507e-07	4.75532e-07	5.78865e-07	9.81091e-08	1.33467e-07	1.73829e-07	2.66851e-07	0.000276759	9.02299e-08	2.14628e-07	1.35599e-07	1.73111e-07	4.30785e-07	7.21502e-07	2.82844e-07	3.8705e-07	1.65666e-05
4	0.00116846	0.012349	0.033763	0.0801404	0.00726985	0.00408231	0.00325869	0.0488822	0.148608	0.0145093	0.00734202	0.00159522	0.0289812	0.00243438	0.0215627	0.0173188	0.0511949	0.0284977
5	0.109156	0.0643312	0.0695611	0.0418808	0.097524	0.074368	0.0855788	0.0582987	0.0175153	0.0936625	0.0576861	0.0914409	0.0683075	0.0822778	0.0349525	0.0936717	0.0629264	0.0707729
6	0.0606969	0.0503536	0.065505	0.0439809	0.0704173	0.0458631	0.0787716	0.0668796	0.0174776	0.0685453	0.0356132	0.0836417	0.0782294	0.0457224	0.0283901	0.0883757	0.0690699	0.0586784
7	2.36206e-07	1.53293e-07	1.52837e-07	9.12341e-08	2.1431e-07	1.61466e-07	1.94819e-07	1.36099e-07	0.00194831	2.04688e-07	1.24591e-07	2.04172e-07	1.54992e-07	1.812e-07	9.22222e-08	1.98713e-07	1.31596e-07	0.000114761
8	6.36138e-08	1.34173e-08	4.47041e-09	1.62213e-08	5.0082e-08	8.50664e-08	9.12255e-09	3.1702e-08	0.000223042	9.3351e-08	1.49788e-07	7.88843e-09	2.14745e-08	1.27503e-07	1.96179e-08	4.26403e-09	1.1965e-08	1.31618e-05
9	5.47658e-08	1.04301e-07	1.30607e-07	1.7072e-07	2.37961e-08	3.22734e-08	3.84234e-08	8.25228e-08	0.000390715	2.70277e-08	5.30099e-08	2.66972e-08	5.2237e-08	9.35012e-08	1.81676e-07	7.30862e-08	1.11742e-07	2.30572e-05
10	0.0179595	0.00102527	0.000678963	0.0049962	0.0105731	0.0154873	0.000804152	0.00957877	0.0687507	0.0211021	0.0278542	0.000393652	0.00567904	0.0374188	0.00179022	0.000348285	0.00319165	0.0133901
11	0.113223	0.0625514	0.0726439	0.0477519	0.10188	0.0774757	0.0866882	0.0603776	0.0163865	0.0980595	0.0601659	0.0934068	0.0708189	0.0852212	0.0321804	0.09765	0.06951	0.0732936
12	0.00166206	0.000197582	0.00102034	8.2883e-05	0.000177433	0.00114223	0.000461019	0.000886468	1.72285e-05	9.53291e-05	0.000905346	0.000465325	0.00102916	0.0012804	7.46953e-05	0.00137604	0.000172195	0.000649749
13	0.0251422	0.00537155	0.000262916	0.0140769	0.0109618	0.0275006	0.000362306	0.0128219	0.0662579	0.0218778	0.0494603	0.000177393	0.00760184	0.0523841	0.00937927	0.000134885	0.00899258	0.018398
14	0.0158344	0.00175162	0.000386855	0.00306949	0.00269151	0.00658237	4.55908e-05	0.00417152	2.1985e-05	0.0021792	0.00503895	5.79027e-05	0.00485975	0.0120522	0.00116619	0.000522214	0.00509098	0.00385427
15	2.11175e-08	5.54248e-08	3.67967e-08	3.70433e-08	1.00342e-07	8.29093e-09	4.00806e-08	1.45927e-08	6.6637e-05	1.21108e-07	2.6681e-09	4.44344e-08	2.13691e-08	6.52934e-09	4.13202e-08	4.86092e-08	4.64605e-08	3.95784e-06
16	2.38457e-07	1.01544e-07	1.19584e-07	5.54381e-08	1.2948e-07	1.79026e-07	1.57929e-07	1.26019e-07	0.000255184	1.09898e-07	1.62633e-07	1.64469e-07	1.38211e-07	2.09008e-07	5.19537e-08	1.59815e-07	9.05855e-08	1.51399e-05
17	3.82461e-08	1.04052e-07	1.08083e-07	1.39074e-07	3.12906e-09	2.72552e-08	2.27448e-08	5.86236e-08	1.54385e-05	3.76709e-09	4.72939e-08	1.20288e-08	3.54333e-08	7.72764e-08	1.79856e-07	5.58741e-08	8.91806e-08	9.67084e-07
18	0.0313639	0.00834536	0.0101237	0.00881204	0.0143549	0.0191176	0.0163272	0.0176084	0.00283059	0.0120268	0.0169165	0.0175544	0.0183453	0.0295212	0.00306453	0.0153093	0.012887	0.0149711
19	0.000764441	0.00261972	0.00958887	0.0105415	0.0132376	0.00160009	0.00297469	0.000180533	0.00145704	0.0164208	0.000470424	0.00397311	0.000873156	7.18941e-05	0.000894129	0.00999253	0.0108752	0.00509034
20	0.00259056	0.000307354	0.00159015	0.000128581	0.000275617	0.00178031	0.000717827	0.00138145	5.78869e-05	0.000147683	0.00141116	0.000724536	0.0016039	0.00199572	0.000116048	0.00214467	0.00026773	0.00101419
21	0.0279317	0.0109545	0.0185086	0.0175781	0.0259969	0.0195141	0.0190116	0.014785	0.00162053	0.0252796	0.0152368	0.0213772	0.0174312	0.0208796	0.00395226	0.0246727	0.0226194	0.0180794
22	0.00417016	1.82421e-06	0.00118921	0.00176124	0.00157908	0.00118776	0.000276646	0.00298954	0.000425344	0.00315157	0.00213622	0.000135424	0.00177243	0.00868857	3.18352e-06	0.000610007	0.00112511	0.00183549
23	8.58448e-07	5.40016e-07	5.4286e-07	2.97246e-07	7.61615e-07	5.82111e-07	6.89549e-07	4.59574e-07	8.67202e-05	7.2981e-07	4.50995e-07	7.30393e-07	5.37585e-07	6.48413e-07	3.09352e-07	7.32097e-07	4.62348e-07	5.65015e-06
24	1.57822e-08	3.12648e-09	4.96113e-10	3.55696e-09	1.21938e-08	2.10096e-08	1.36492e-09	7.1911e-09	0.000240449	2.30324e-08	3.7058e-08	1.0881e-09	4.546e-09	3.17261e-08	4.86355e-09	4.12684e-10	2.36338e-09	1.4154e-05
25	3.72214e-08	1.02456e-07	1.07036e-07	1.38048e-07	2.11874e-09	2.62542e-08	2.15021e-08	5.74224e-08	0.000109803	2.99626e-09	4.65979e-08	1.09138e-08	3.42743e-08	7.64614e-08	1.78314e-07	5.50765e-08	8.82878e-08	6.51694e-06
26	0.0281647	0.0571608	0.0531496	0.0632799	0.00538975	0.0341395	0.0125001	0.0175627	0.0446664	0.010757	0.0614005	0.00611902	0.0104125	0.0586815	0.0998092	0.0272632	0.0404242	0.0371106
27	0.163132	0.204633	0.169255	0.167539	0.203733	0.208561	0.210434	0.197511	0.108645	0.200512	0.190147	0.197684	0.191559	0.190727	0.233959	0.129442	0.141127	0.182859
28	0.078434	0.0579202	0.0683871	0.0461446	0.0808611	0.056107	0.082469	0.068995	0.016425	0.0717665	0.0373772	0.0886229	0.0767103	0.0466691	0.029326	0.0920074	0.066633	0.0626385
29	0.0758727	0.103262	0.0473316	0.0444704	0.0805877	0.0870846	0.0772659	0.0693368	0.0216993	0.0768961	0.0673449	0.0806332	0.0810132	0.0574451	0.0631129	0.0640944	0.0732657	0.0688657
30	1.17178e-07	1.61712e-07	1.77512e-07	1.9863e-07	1.66622e-07	1.88768e-07	1.98698e-07	1.95474e-07	0.00103736	1.66158e-07	1.81894e-07	1.87534e-07	1.88199e-07	1.50593e-07	2.22135e-07	1.31228e-07	1.59537e-07	6.11853e-05
31	1.5666e-08	3.24362e-09	3.73633e-10	3.65294e-09	1.20427e-08	2.12158e-08	1.17171e-09	7.44195e-09	0.000241855	2.29199e-08	3.72123e-08	9.05875e-10	4.81716e-09	3.16922e-08	4.93135e-09	3.03179e-10	2.51129e-09	1.42368e-05
32	1.8688e-07	9.88732e-08	1.02155e-07	4.65263e-08	7.48136e-08	1.93531e-08	3.42828e-08	8.40273e-09	0.000684632	6.69139e-08	6.12512e-09	4.93091e-08	1.72111e-08	1.27774e-07	4.31414e-08	1.56435e-07	8.78248e-08	4.03387e-05
33	0.0421124	0.0353547	0.0573914	0.0454696	0.00879807	0.00244416	0.00978617	0.0116509	0.185674	0.00146336	0.0236748	0.0188705	0.0184235	0.00867081	0.00811664	0.088079	0.0695406	0.0373836
34	0.0624126	0.108995	0.0834194	0.101534	0.0937952	0.108749	0.102794	0.110022	0.0211652	0.0934777	0.105198	0.0914848	0.0996882	0.0917118	0.153043	0.0472756	0.0689347	0.0908059
35	0.0480546	0.0885895	0.0894183	0.105638	0.0805534	0.102392	0.0998387	0.10721	0.0238344	0.0833086	0.10548	0.0913826	0.099115	0.0787424	0.133502	0.0558106	0.0762984	0.0864216
36	0.0576617	0.05608	0.0828756	0.0710068	0.0771124	0.0455016	0.0934218	0.102541	0.0187322	0.0603537	0.022454	0.102322	0.107864	0.019709	0.0231397	0.111097	0.094673	0.0674438
37	0.0324897	0.0678436	0.0639474	0.0801148	0.0122285	0.059318	0.0162105	0.0163275	0.211512	0.024406	0.106684	0.00793531	0.00968018	0.0676927	0.118463	0.032802	0.0511785	0.0575785
