# Supplementary material for: Error Distribution of a 5-Axis Measuring Machine Based on Sensitivity Analysis of Geometric Errors
Source: Hindawi journal article supplement (doi:10.1155/2020/8146975), 2020-02-14
Supplement: f1 [file 8146975.f1.zip › 8146975.f1/Sensitivity indices of geometric errors on volumetric measurement error before error distribution.xlsx]

## Sheet: Sheet1
	1	2	3	4	5	6	7	8	9	10	11	12	13	14	15	16	17	Mean
1	9.46927e-08	6.54818e-08	6.6547e-08	4.33727e-08	8.99781e-08	7.28971e-08	8.26692e-08	5.97214e-08	0.000604274	8.71992e-08	6.12045e-08	8.52952e-08	6.64362e-08	8.16399e-08	4.42873e-08	7.97705e-08	5.73216e-08	3.56125e-05
2	3.5043e-08	4.78267e-08	1.0845e-08	1.05903e-08	3.08306e-08	4.16393e-08	2.14329e-08	2.30839e-08	2.27896e-06	3.32154e-08	4.66618e-08	2.23252e-08	2.5238e-08	4.18578e-08	5.1565e-08	1.31215e-08	1.45171e-08	1.61691e-07
3	9.91345e-08	1.44053e-07	1.54988e-07	2.02139e-07	4.24893e-08	4.81444e-08	6.371e-08	9.42011e-08	0.000160612	3.96573e-08	8.01484e-08	5.17835e-08	6.10583e-08	1.56507e-07	2.73601e-07	8.86686e-08	1.27564e-07	9.5494e-06
4	0.00212745	0.0251269	0.0674277	0.170887	0.0138072	0.00854154	0.00640392	0.10175	0.457431	0.027845	0.0165876	0.00306533	0.058891	0.00495762	0.0499077	0.0318765	0.101811	0.0675555
5	0.35334	0.232706	0.246966	0.15876	0.329283	0.27663	0.298986	0.215734	0.168981	0.319552	0.231696	0.312381	0.246762	0.29789	0.143821	0.306504	0.222471	0.256615
6	0.0707316	0.0655721	0.0837244	0.0600207	0.0855937	0.0614156	0.0990735	0.0890955	0.0163961	0.0841897	0.0514945	0.102865	0.101738	0.0595942	0.0420546	0.104104	0.0879096	0.0744455
7	7.744e-08	5.86955e-08	5.38793e-08	3.58341e-08	7.40692e-08	6.24677e-08	6.84782e-08	5.24852e-08	0.000946545	7.17908e-08	5.28564e-08	7.01057e-08	5.7802e-08	6.80037e-08	4.24356e-08	6.39043e-08	4.72664e-08	5.57355e-05
8	2.10442e-08	6.88884e-09	3.10398e-09	7.24268e-09	1.8241e-08	3.1038e-08	5.32431e-09	1.31914e-08	0.000364435	3.17784e-08	5.65484e-08	4.93628e-09	9.68335e-09	4.42242e-08	9.47583e-09	3.07421e-09	5.73154e-09	2.14533e-05
9	2.39334e-08	3.63751e-08	6.76346e-08	1.08297e-07	2.09544e-08	1.98443e-08	2.08979e-08	6.38086e-08	6.44919e-05	2.71566e-08	3.06278e-08	1.55245e-08	4.19314e-08	4.0131e-08	7.2841e-08	3.81567e-08	6.98206e-08	3.8347e-06
10	0.00817527	0.000521545	0.000338987	0.0026634	0.00502025	0.00810125	0.000395083	0.00498462	0.0136786	0.0101243	0.0157326	0.000189115	0.00288502	0.0190514	0.00103589	0.000160261	0.0015868	0.00556732
11	0.0916262	0.056567	0.0644785	0.0452549	0.0859978	0.0720475	0.0757156	0.0558567	0.00988494	0.083639	0.060414	0.0797744	0.0639587	0.0771367	0.0331036	0.0798809	0.0614374	0.0645161
12	0.00075829	0.000101638	0.000510621	4.4948e-05	8.58396e-05	0.000598836	0.00022794	0.00046234	1.36231e-05	4.72811e-05	0.000512483	0.000225049	0.000524012	0.00065334	4.39239e-05	0.000634651	8.66848e-05	0.000325382
13	0.0114449	0.00273246	0.000131291	0.00750423	0.00520484	0.0143853	0.000178032	0.0066723	0.0120713	0.0104965	0.0279362	8.52539e-05	0.00386184	0.0266708	0.00542723	6.20989e-05	0.00447089	0.00819621
14	0.00461305	0.000570265	0.000123626	0.00104724	0.000817909	0.00220363	1.435e-05	0.00138931	4.09697e-06	0.000669155	0.00182151	1.7818e-05	0.00158005	0.00392719	0.00043188	0.000153803	0.00161992	0.00123558
15	8.28171e-09	2.02322e-08	1.34677e-08	1.40064e-08	3.26337e-08	4.90338e-09	1.46063e-08	6.81898e-09	3.21923e-05	3.92748e-08	2.81471e-09	1.57201e-08	9.07775e-09	4.0469e-09	1.7195e-08	1.63274e-08	1.65804e-08	1.90755e-06
16	8.22404e-08	4.14848e-08	4.78511e-08	2.58811e-08	5.16175e-08	7.02839e-08	6.07877e-08	5.04624e-08	6.57791e-05	4.56105e-08	6.73432e-08	6.22058e-08	5.45526e-08	7.87401e-08	2.4462e-08	5.8774e-08	3.8092e-08	3.91997e-06
17	1.2011e-08	3.50799e-08	3.50333e-08	4.78102e-08	1.77223e-09	1.01081e-08	7.81776e-09	2.00903e-08	0.000136424	1.95915e-09	1.80437e-08	4.39628e-09	1.21739e-08	2.60907e-08	6.79235e-08	1.70549e-08	2.88968e-08	8.04533e-06
18	0.00913729	0.00271691	0.00323488	0.00300647	0.00436218	0.00640013	0.00513381	0.00586439	0.000157116	0.00369294	0.00611504	0.00539728	0.00596457	0.00961944	0.0011349	0.00450849	0.00410055	0.00473802
19	0.000222711	0.000852885	0.003064	0.00359652	0.00402263	0.000535667	0.000935332	6.01232e-05	0.000115306	0.00504214	0.000170048	0.00122156	0.000283882	2.34264e-05	0.000331131	0.00294273	0.0034604	0.0015812
20	0.000754763	0.000100099	0.000508148	4.38962e-05	8.38056e-05	0.00059605	0.000225756	0.000460122	8.24407e-06	4.53961e-05	0.000510147	0.000222814	0.000521511	0.000650348	4.29998e-05	0.000631634	8.52256e-05	0.000322998
21	0.00813738	0.00356634	0.00591415	0.00599721	0.00789996	0.00653288	0.00597786	0.00492406	0.000186031	0.00776234	0.00550785	0.0065726	0.00566735	0.00680359	0.00146363	0.00726591	0.00719727	0.00572802
22	0.0012149	5.97354e-07	0.000379997	0.000600902	0.000479851	0.000397637	8.69867e-05	0.000995654	2.20512e-05	0.000967718	0.00077221	4.16373e-05	0.000576268	0.00283116	1.18478e-06	0.000179644	0.000358005	0.000582729
23	2.50414e-07	1.76219e-07	1.73595e-07	1.01547e-07	2.31771e-07	1.95243e-07	2.1703e-07	1.53314e-07	4.728e-05	2.24442e-07	1.63401e-07	2.24787e-07	1.75047e-07	2.11681e-07	1.15044e-07	2.15752e-07	1.47291e-07	2.95627e-06
24	4.86161e-09	1.33087e-09	2.15385e-10	1.24757e-09	3.95997e-09	7.31916e-09	5.65789e-10	2.52079e-09	0.000189553	7.3399e-09	1.36926e-08	4.85407e-10	1.61988e-09	1.06721e-08	2.18044e-09	2.05039e-10	8.18629e-10	1.11536e-05
25	1.11612e-08	3.36879e-08	3.42951e-08	4.71437e-08	9.60779e-10	9.1105e-09	6.94814e-09	1.92791e-08	1.96845e-05	1.25149e-09	1.71729e-08	3.55839e-09	1.13167e-08	2.52981e-08	6.6432e-08	1.63461e-08	2.81748e-08	1.17745e-06
26	0.0512829	0.116307	0.106145	0.134935	0.0102365	0.0714319	0.0245653	0.0365572	0.191944	0.020644	0.138721	0.0117584	0.0211587	0.119508	0.231014	0.05018	0.0803913	0.0833399
27	0.0742584	0.104094	0.0845045	0.0893127	0.0967352	0.109096	0.103387	0.102781	0.0191786	0.0962015	0.107399	0.0949684	0.0973142	0.0971065	0.135378	0.0595617	0.0701645	0.0906729
28	0.142815	0.117853	0.136576	0.0983967	0.153576	0.117396	0.162069	0.143615	0.0481204	0.137729	0.084446	0.1703	0.155879	0.0950445	0.0678769	0.169347	0.132513	0.125503
29	0.0884164	0.134471	0.0604964	0.0606888	0.0979561	0.116616	0.0971797	0.0923689	0.0216916	0.0944465	0.0973766	0.0991655	0.105358	0.0748736	0.0934899	0.0755012	0.09325	0.0884321
30	3.43256e-08	5.31072e-08	5.66486e-08	6.77074e-08	5.08073e-08	6.3607e-08	6.24838e-08	6.52091e-08	6.40758e-06	5.12293e-08	6.62132e-08	5.76872e-08	6.13348e-08	4.93812e-08	8.27776e-08	3.86026e-08	5.07764e-08	4.30558e-07
31	4.73871e-09	1.40914e-09	1.2623e-10	1.27155e-09	3.85087e-09	7.40991e-09	4.57886e-10	2.63781e-09	1.68375e-05	7.24902e-09	1.37778e-08	3.82986e-10	1.75553e-09	1.05894e-08	2.2408e-09	1.24919e-10	8.83739e-10	9.93906e-07
32	6.09272e-08	3.77116e-08	4.06443e-08	2.12913e-08	3.03222e-08	1.15042e-08	1.98444e-08	1.05015e-08	0.000582643	2.7992e-08	6.44695e-09	2.45526e-08	1.43785e-08	4.70959e-08	1.95196e-08	5.60123e-08	3.58804e-08	3.43005e-05
33	0.0122686	0.01151	0.0183386	0.0155131	0.00267354	0.000818263	0.00307711	0.0038803	0.0147309	0.00044933	0.0085581	0.00580192	0.00599	0.00282535	0.0030058	0.0259386	0.0221272	0.0092651
34	0.0284105	0.0554438	0.0416492	0.0541262	0.0445352	0.0568855	0.0505027	0.0572537	0.00376269	0.0448486	0.0594176	0.0439498	0.0506428	0.0466939	0.0885565	0.0217536	0.0342726	0.0460415
35	0.0139998	0.0288411	0.0285722	0.0360411	0.0244786	0.0342784	0.0313925	0.0357055	0.00144131	0.0255806	0.0381295	0.0280964	0.032225	0.0256581	0.0494395	0.0164358	0.0242775	0.0279172
36	0.0167987	0.0182573	0.0264816	0.0242257	0.023433	0.0152329	0.0293749	0.0341506	0.00165243	0.0185321	0.00811678	0.0314598	0.0350694	0.00642216	0.00856929	0.0327173	0.0301241	0.0212128
37	0.00946527	0.0220871	0.0204335	0.0273332	0.003716	0.0198583	0.00509711	0.00543777	0.0152888	0.00749407	0.0385647	0.00243978	0.00314729	0.0220576	0.0438701	0.00965993	0.0162846	0.0160138
