# Supplementary material for: Error Distribution of a 5-Axis Measuring Machine Based on Sensitivity Analysis of Geometric Errors
Source: Hindawi journal article supplement (doi:10.1155/2020/8146975), 2020-02-14
Supplement: f1 [file 8146975.f1.zip › 8146975.f1/The X directional sensitivity indices of geometric errors after error distribution.xlsx]

## Sheet: Sheet1
	1	2	3	4	5	6	7	8	9	10	11	12	13	14	15	16	17	Mean
1	3.08039e-07	2.96896e-07	3.06851e-07	2.88479e-07	2.36872e-07	2.27436e-07	2.44183e-07	2.28289e-07	2.0533e-07	2.36872e-07	2.27436e-07	2.44183e-07	2.28289e-07	3.08039e-07	2.96896e-07	3.06851e-07	2.88479e-07	2.63495e-07
2	3.12638e-08	2.8431e-08	1.12482e-08	2.79546e-08	3.24085e-08	3.75721e-08	2.47286e-08	4.01869e-08	3.75277e-08	3.24085e-08	3.75721e-08	2.47286e-08	4.01869e-08	3.12638e-08	2.8431e-08	1.12482e-08	2.79546e-08	2.97126e-08
3	1.20055e-07	5.48632e-08	9.01003e-08	5.95069e-08	1.16484e-07	3.17063e-08	1.02053e-07	3.26611e-08	2.77183e-08	1.16484e-07	3.17063e-08	1.02053e-07	3.26611e-08	1.20055e-07	5.48632e-08	9.01003e-08	5.95069e-08	7.30927e-08
4	6.6563e-08	6.42953e-08	2.51339e-08	2.05145e-08	9.18989e-08	9.20932e-08	6.22048e-08	5.94909e-08	8.41454e-08	9.18989e-08	9.20932e-08	6.22048e-08	5.94909e-08	6.6563e-08	6.42953e-08	2.51339e-08	2.05145e-08	6.16785e-08
5	0.132506	0.131791	0.136594	0.131088	0.0973586	0.0974204	0.103357	0.0999153	0.0854903	0.0973586	0.0974204	0.103357	0.0999153	0.132506	0.131791	0.136594	0.131088	0.114444
6	0.0737501	0.0983505	0.129262	0.15592	0.0681646	0.0599571	0.0933023	0.113953	0.0803285	0.0681646	0.0599571	0.0933023	0.113953	0.0737501	0.0983505	0.129262	0.15592	0.0979792
7	2.78348e-07	2.74733e-07	2.7653e-07	2.63827e-07	2.16604e-07	2.1302e-07	2.2137e-07	2.12122e-07	1.91043e-07	2.16604e-07	2.1302e-07	2.2137e-07	2.12122e-07	2.78348e-07	2.74733e-07	2.7653e-07	2.63827e-07	2.41421e-07
8	3.53759e-09	3.70749e-09	2.46349e-09	2.88641e-09	6.9843e-09	5.13236e-09	6.03608e-09	6.47684e-09	8.02831e-09	6.9843e-09	5.13236e-09	6.03608e-09	6.47684e-09	3.53759e-09	3.70749e-09	2.46349e-09	2.88641e-09	4.85161e-09
9	1.34846e-08	2.36618e-09	6.75679e-09	1.38804e-09	1.77555e-08	5.16854e-09	1.37647e-08	3.11022e-09	1.02286e-08	1.77555e-08	5.16854e-09	1.37647e-08	3.11022e-09	1.34846e-08	2.36618e-09	6.75679e-09	1.38804e-09	8.10692e-09
10	2.83249e-08	1.96415e-08	1.48999e-08	8.45802e-09	1.50423e-08	1.08812e-08	1.00362e-08	5.70617e-09	7.05884e-09	1.50423e-08	1.08812e-08	1.00362e-08	5.70617e-09	2.83249e-08	1.96415e-08	1.48999e-08	8.45802e-09	1.37082e-08
11	0.137739	0.136996	0.141988	0.136265	0.101204	0.101268	0.107439	0.103862	0.0888658	0.101204	0.101268	0.107439	0.103862	0.137739	0.136996	0.141988	0.136265	0.118964
12	0.00195141	0.000591974	0.00201144	0.000588643	0.000437432	0.00143483	0.00046424	0.00147143	0.000253265	0.000437432	0.00143483	0.00046424	0.00147143	0.00195141	0.000591974	0.00201144	0.000588643	0.00106801
13	8.65553e-08	8.20065e-08	2.32944e-08	2.0467e-08	1.07181e-07	1.04567e-07	6.16827e-08	5.66657e-08	9.01617e-08	1.07181e-07	1.04567e-07	6.16827e-08	5.66657e-08	8.65553e-08	8.20065e-08	2.32944e-08	2.0467e-08	6.91177e-08
14	0.0189392	0.0026853	0.000764497	0.0126082	0.00377507	0.00884096	9.01122e-05	0.00700831	0.000394523	0.00377507	0.00884096	9.01122e-05	0.00700831	0.0189392	0.0026853	0.000764497	0.0126082	0.00645987
15	7.04422e-08	6.95939e-08	6.96659e-08	6.7274e-08	5.37271e-08	5.35778e-08	5.42997e-08	5.29088e-08	1.72944e-07	5.37271e-08	5.35778e-08	5.42997e-08	5.29088e-08	7.04422e-08	6.95939e-08	6.96659e-08	6.7274e-08	6.79954e-08
16	2.2572e-07	2.24865e-07	2.30746e-07	2.2219e-07	1.67374e-07	1.67663e-07	1.75979e-07	1.70362e-07	2.11654e-08	1.67374e-07	1.67663e-07	1.75979e-07	1.70362e-07	2.2572e-07	2.24865e-07	2.30746e-07	2.2219e-07	1.87704e-07
17	1.73488e-09	1.6376e-09	5.23058e-10	7.35005e-10	2.60763e-09	2.35122e-09	1.4936e-09	1.37593e-09	2.26349e-09	2.60763e-09	2.35122e-09	1.4936e-09	1.37593e-09	1.73488e-09	1.6376e-09	5.23058e-10	7.35005e-10	1.5989e-09
18	0.0257698	0.0256308	0.0265649	0.0254941	0.0189344	0.0189464	0.0201009	0.0194317	4.54607e-09	0.0189344	0.0189464	0.0201009	0.0194317	0.0257698	0.0256308	0.0265649	0.0254941	0.0212792
19	0.00858922	0.00854288	0.00885417	0.00849726	0.00630805	0.00631206	0.0066967	0.00647374	0.0221586	0.00630805	0.00631206	0.0066967	0.00647374	0.00858922	0.00854288	0.00885417	0.00849726	0.00839452
20	0.00304146	0.000921705	0.00313528	0.000916778	0.000680906	0.00223614	0.000722849	0.00229339	0.000393888	0.000680906	0.00223614	0.000722849	0.00229339	0.00304146	0.000921705	0.00313528	0.000916778	0.00166417
21	0.0343322	0.034147	0.0353914	0.0339648	0.0252256	0.0252417	0.0267797	0.0258881	0.0221503	0.0252256	0.0252417	0.0267797	0.0258881	0.0343322	0.034147	0.0353914	0.0339648	0.0296524
22	1.00198e-09	8.28594e-10	1.14589e-10	1.23581e-10	1.76553e-09	1.4502e-09	8.93033e-10	6.57867e-10	1.49938e-09	1.76553e-09	1.4502e-09	8.93033e-10	6.57867e-10	1.00198e-09	8.28594e-10	1.14589e-10	1.23581e-10	8.9236e-10
23	1.03891e-06	1.03303e-06	1.07024e-06	1.02709e-06	7.64203e-07	7.64251e-07	8.10505e-07	7.8327e-07	6.70984e-07	7.64203e-07	7.64251e-07	8.10505e-07	7.8327e-07	1.03891e-06	1.03303e-06	1.07024e-06	1.02709e-06	8.97293e-07
24	6.734e-10	4.8344e-10	1.66872e-10	1.80212e-10	1.21174e-09	8.94986e-10	7.38418e-10	5.36201e-10	1.05381e-09	1.21174e-09	8.94986e-10	7.38418e-10	5.36201e-10	6.734e-10	4.8344e-10	1.66872e-10	1.80212e-10	6.36726e-10
25	6.66389e-10	4.61217e-10	2.25181e-10	2.07381e-10	1.1341e-09	7.52249e-10	6.90298e-10	4.20723e-10	1.02958e-09	1.1341e-09	7.52249e-10	6.90298e-10	4.20723e-10	6.66389e-10	4.61217e-10	2.25181e-10	2.07381e-10	5.96744e-10
26	6.33725e-10	3.18e-10	1.01953e-10	9.1973e-11	1.05776e-09	6.7427e-10	5.69802e-10	2.55393e-10	7.80438e-10	1.05776e-09	6.7427e-10	5.69802e-10	2.55393e-10	6.33725e-10	3.18e-10	1.01953e-10	9.1973e-11	4.81541e-10
27	0.0784913	0.0780679	0.0422072	0.0405058	0.192208	0.19233	0.165535	0.160024	0.219103	0.192208	0.19233	0.165535	0.160024	0.0784913	0.0780679	0.0422072	0.0405058	0.124579
28	0.129962	0.129261	0.133972	0.128572	0.095489	0.0955497	0.101372	0.0979969	0.0838474	0.095489	0.0955497	0.101372	0.0979969	0.129962	0.129261	0.133972	0.128572	0.112247
29	0.0306555	0.0304901	0.0164844	0.0158199	0.0750686	0.0751164	0.0646513	0.0624987	0.0855726	0.0750686	0.0751164	0.0646513	0.0624987	0.0306555	0.0304901	0.0164844	0.0158199	0.0486554
30	6.19347e-08	6.28511e-08	6.28546e-08	6.14319e-08	1.52416e-07	1.5365e-07	1.61038e-07	1.56914e-07	2.03052e-07	1.52416e-07	1.5365e-07	1.61038e-07	1.56914e-07	6.19347e-08	6.28511e-08	6.28546e-08	6.14319e-08	1.14661e-07
31	4.79713e-10	7.54869e-10	1.18601e-10	5.55266e-10	9.64073e-10	1.11357e-09	5.82941e-10	8.95272e-10	1.05765e-09	9.64073e-10	1.11357e-09	5.82941e-10	8.95272e-10	4.79713e-10	7.54869e-10	1.18601e-10	5.55266e-10	7.05074e-10
32	2.61334e-07	2.60546e-07	2.76851e-07	2.66751e-07	8.71705e-08	8.43756e-08	9.50763e-08	9.24396e-08	8.63365e-09	8.71705e-08	8.43756e-08	9.50763e-08	9.24397e-08	2.61334e-07	2.60546e-07	2.76851e-07	2.66751e-07	1.68101e-07
33	0.151315	0.150499	0.155984	0.149696	0.0473646	0.0473947	0.0502829	0.0486087	7.20019e-10	0.0473646	0.0473947	0.0502829	0.0486087	0.151315	0.150499	0.155984	0.149696	0.0942523
34	0.0122418	0.0121758	0.00111211	0.00106728	0.0858824	0.0859369	0.0661016	0.0639007	0.110131	0.0858824	0.0859369	0.0661016	0.0639007	0.0122418	0.0121758	0.00111211	0.00106728	0.0451158
35	0.00470437	0.00467899	0.00484951	0.00465403	0.0672681	0.0673109	0.0714123	0.0690347	0.100656	0.0672681	0.0673109	0.0714123	0.0690347	0.00470437	0.00467899	0.00484951	0.00465403	0.0404989
36	0.156009	0.155168	0.160823	0.15434	0.114628	0.114701	0.12169	0.117639	0.100654	0.114628	0.114701	0.12169	0.117639	0.156009	0.155168	0.160823	0.15434	0.134744
37	3.61307e-10	1.73157e-10	1.14377e-10	6.55295e-11	8.83483e-10	6.30119e-10	4.90762e-10	3.40083e-10	8.71397e-10	8.83483e-10	6.30119e-10	4.90762e-10	3.40083e-10	3.61307e-10	1.73157e-10	1.14377e-10	6.55295e-11	4.1112e-10
