# Supplementary material for: Error Distribution of a 5-Axis Measuring Machine Based on Sensitivity Analysis of Geometric Errors
Source: Hindawi journal article supplement (doi:10.1155/2020/8146975), 2020-02-14
Supplement: f1 [file 8146975.f1.zip › 8146975.f1/The X directional sensitivity indices of geometric errors before error distribution.xlsx]

## Sheet: Sheet1
	1	2	3	4	5	6	7	8	9	10	11	12	13	14	15	16	17	Mean
1	1.04073e-07	9.78126e-08	9.78933e-08	9.14752e-08	9.14318e-08	8.76292e-08	9.01674e-08	8.369e-08	8.21525e-08	9.14318e-08	8.76292e-08	9.01674e-08	8.369e-08	1.04073e-07	1.04073e-07	9.78933e-08	9.14752e-08	9.27505e-08
2	2.13459e-08	2.20219e-08	1.26155e-08	1.84478e-08	2.78457e-08	2.94435e-08	2.30302e-08	2.90928e-08	3.11981e-08	2.78457e-08	2.94435e-08	2.30302e-08	2.90928e-08	2.13459e-08	2.13459e-08	1.26155e-08	1.84478e-08	2.3424e-08
3	4.49624e-08	1.74916e-08	3.25356e-08	1.67258e-08	4.96156e-08	1.39937e-08	4.2109e-08	1.24756e-08	1.77055e-08	4.96156e-08	1.39937e-08	4.2109e-08	1.24756e-08	4.49624e-08	4.49624e-08	3.25356e-08	1.67258e-08	2.97056e-08
4	4.84468e-08	4.62844e-08	2.47439e-08	2.23703e-08	6.97651e-08	6.98894e-08	5.23098e-08	5.02209e-08	6.78832e-08	6.97651e-08	6.98894e-08	5.23098e-08	5.02209e-08	4.84468e-08	4.84468e-08	2.47439e-08	2.23703e-08	4.93004e-08
5	0.405329	0.396588	0.399434	0.385157	0.332643	0.3352	0.340502	0.329864	0.301969	0.332643	0.3352	0.340502	0.329864	0.405329	0.405329	0.399434	0.385157	0.362361
6	0.0812156	0.106545	0.136078	0.164924	0.0838427	0.0742673	0.110656	0.135435	0.102146	0.0838427	0.0742673	0.110656	0.135435	0.0812156	0.0812156	0.136078	0.164924	0.109573
7	8.25853e-08	8.00401e-08	7.68443e-08	7.34621e-08	7.4947e-08	7.35738e-08	7.27928e-08	6.97891e-08	6.91524e-08	7.4947e-08	7.35738e-08	7.27928e-08	6.97891e-08	8.25853e-08	8.25853e-08	7.68443e-08	7.34621e-08	7.52804e-08
8	2.6996e-09	2.81306e-09	2.07061e-09	2.24561e-09	4.85881e-09	4.02602e-09	4.26115e-09	4.47589e-09	5.54239e-09	4.85881e-09	4.02602e-09	4.26115e-09	4.47589e-09	2.6996e-09	2.6996e-09	2.07061e-09	2.24561e-09	3.54885e-09
9	7.7365e-09	3.18973e-09	4.86772e-09	2.10438e-09	1.05116e-08	5.0884e-09	8.59317e-09	3.89241e-09	7.62776e-09	1.05116e-08	5.0884e-09	8.59317e-09	3.89241e-09	7.7365e-09	7.7365e-09	4.86772e-09	2.10438e-09	6.12601e-09
10	1.39832e-08	1.07016e-08	8.38872e-09	5.93894e-09	1.06073e-08	8.69096e-09	8.01545e-09	5.89413e-09	7.04864e-09	1.06073e-08	8.69096e-09	8.01545e-09	5.89413e-09	1.39832e-08	1.39832e-08	8.38872e-09	5.93894e-09	9.10417e-09
11	0.105335	0.103063	0.103803	0.100093	0.0864455	0.0871101	0.0884878	0.0857234	0.0784741	0.0864455	0.0871101	0.0884878	0.0857234	0.105335	0.105335	0.103803	0.100093	0.0941686
12	0.000841393	0.000252415	0.000829049	0.000245038	0.000211781	0.000695884	0.000216709	0.000684715	0.000127257	0.000211781	0.000695884	0.000216709	0.000684715	0.000841393	0.000841393	0.000829049	0.000245038	0.000510012
13	8.19898e-08	7.71783e-08	5.10832e-08	4.70194e-08	8.77296e-08	8.88522e-08	6.6213e-08	6.16603e-08	7.77871e-08	8.77296e-08	8.88522e-08	6.6213e-08	6.16603e-08	8.19898e-08	8.19898e-08	5.10832e-08	4.70194e-08	7.09441e-08
14	0.0052141	0.000727276	0.000201222	0.00333408	0.00116085	0.00273778	2.67344e-05	0.0020824	0.000125435	0.00116085	0.00273778	2.67344e-05	0.0020824	0.0052141	0.0052141	0.000201222	0.00333408	0.00209301
15	2.15575e-08	2.13044e-08	2.06175e-08	2.04451e-08	1.86822e-08	1.89062e-08	1.82045e-08	1.81878e-08	5.72011e-08	1.86822e-08	1.89062e-08	1.82045e-08	1.81878e-08	2.15575e-08	2.15575e-08	2.06174e-08	2.04451e-08	2.19567e-08
16	7.70234e-08	7.57567e-08	7.53709e-08	7.32078e-08	6.39528e-08	6.46944e-08	6.4841e-08	6.31324e-08	1.82345e-08	6.39528e-08	6.46944e-08	6.4841e-08	6.31324e-08	7.70234e-08	7.70234e-08	7.53709e-08	7.32078e-08	6.67918e-08
17	1.16849e-09	1.25569e-09	8.02491e-10	9.99699e-10	1.61001e-09	1.60202e-09	1.17457e-09	1.22984e-09	1.56244e-09	1.61001e-09	1.60202e-09	1.17457e-09	1.22984e-09	1.16849e-09	1.16849e-09	8.02491e-10	9.99699e-10	1.24476e-09
18	0.00709461	0.00694161	0.00699143	0.00674155	0.00582236	0.00586713	0.00595993	0.00577373	3.11506e-09	0.00582236	0.00586713	0.00595993	0.00577373	0.00709461	0.00709461	0.00699143	0.00674155	0.00603163
19	0.00236468	0.00231368	0.00233027	0.00224698	0.00193972	0.00195464	0.00198556	0.00192353	0.00704426	0.00193972	0.00195464	0.00198556	0.00192353	0.00236468	0.00236468	0.00233027	0.00224698	0.00242432
20	0.000837396	0.000249687	0.000825209	0.000242483	0.000209433	0.000692516	0.000214376	0.000681487	0.000125267	0.000209433	0.000692516	0.000214376	0.000681487	0.000837396	0.000837396	0.000825209	0.000242483	0.00050695
21	0.0094519	0.00924805	0.00931443	0.00898152	0.00775692	0.00781656	0.00794019	0.00769214	0.00704163	0.00775692	0.00781656	0.00794019	0.00769214	0.0094519	0.0094519	0.00931443	0.00898152	0.00844993
22	4.31918e-10	3.72241e-10	1.03539e-10	1.04026e-10	8.23743e-10	7.36252e-10	4.47723e-10	3.63264e-10	7.58076e-10	8.23743e-10	7.36252e-10	4.47723e-10	3.63264e-10	4.31918e-10	4.31918e-10	1.03539e-10	1.04026e-10	4.46068e-10
23	2.86158e-07	2.79921e-07	2.8178e-07	2.71737e-07	2.35263e-07	2.36908e-07	2.40522e-07	2.32937e-07	2.13596e-07	2.35263e-07	2.36908e-07	2.40522e-07	2.32937e-07	2.86158e-07	2.86158e-07	2.8178e-07	2.71737e-07	2.55899e-07
24	3.19708e-10	2.72138e-10	1.56259e-10	1.78575e-10	5.82538e-10	4.84173e-10	3.88191e-10	3.20275e-10	5.51364e-10	5.82538e-10	4.84173e-10	3.88191e-10	3.20275e-10	3.19708e-10	3.19708e-10	1.56259e-10	1.78575e-10	3.53097e-10
25	3.84491e-10	3.11497e-10	2.34269e-10	2.26327e-10	6.15493e-10	4.82519e-10	4.3211e-10	3.26745e-10	5.89688e-10	6.15493e-10	4.82519e-10	4.3211e-10	3.26745e-10	3.84491e-10	3.84491e-10	2.34269e-10	2.26327e-10	3.93505e-10
26	2.22815e-10	1.63712e-10	7.7048e-11	1.17577e-10	4.04902e-10	3.02221e-10	2.15911e-10	1.28797e-10	3.30485e-10	4.04902e-10	3.02221e-10	2.15911e-10	1.28797e-10	2.22815e-10	2.22815e-10	7.70481e-11	1.17577e-10	2.15032e-10
27	0.0337645	0.0330363	0.0173566	0.0167363	0.0923506	0.0930606	0.0766895	0.0742937	0.108833	0.0923506	0.0930606	0.0766895	0.0742937	0.0337645	0.0337645	0.0173566	0.0167363	0.0578904
28	0.223623	0.2188	0.220371	0.212494	0.18352	0.184931	0.187856	0.181987	0.166596	0.18352	0.184931	0.187856	0.181987	0.223623	0.223623	0.220371	0.212494	0.199917
29	0.0337587	0.0330307	0.0173537	0.0167334	0.0923349	0.0930448	0.0766765	0.0742811	0.108815	0.0923349	0.0930448	0.0766765	0.0742811	0.0337587	0.0337587	0.0173537	0.0167334	0.0578806
30	1.70142e-08	1.71303e-08	1.65071e-08	1.63787e-08	4.69548e-08	4.77823e-08	4.78045e-08	4.68309e-08	6.47389e-08	4.69548e-08	4.77823e-08	4.78045e-08	4.68309e-08	1.70142e-08	1.70142e-08	1.65071e-08	1.63787e-08	3.39664e-08
31	1.78991e-10	3.83605e-10	9.51247e-11	3.67262e-10	4.35838e-10	5.62613e-10	2.95691e-10	5.11271e-10	5.60386e-10	4.35838e-10	5.62613e-10	2.95691e-10	5.11271e-10	1.78991e-10	1.78991e-10	9.51247e-11	3.67262e-10	3.53915e-10
32	7.95279e-08	7.98679e-08	8.59085e-08	8.55255e-08	3.42893e-08	3.22068e-08	3.82487e-08	3.91362e-08	1.15157e-08	3.42893e-08	3.22068e-08	3.82487e-08	3.91362e-08	7.95279e-08	7.95279e-08	8.59085e-08	8.55255e-08	5.65057e-08
33	0.0416581	0.0407596	0.0410524	0.0395851	0.0145646	0.0146766	0.0149089	0.0144432	3.0694e-10	0.0145646	0.0146766	0.0149089	0.0144432	0.0416581	0.0416581	0.0410524	0.0395851	0.0261291
34	0.00526606	0.00515249	0.000457341	0.000440994	0.041264	0.0415813	0.0306236	0.0296669	0.0547045	0.041264	0.0415813	0.0306236	0.0296669	0.00526606	0.00526606	0.000457341	0.000440994	0.0213955
35	0.00129515	0.00126721	0.00127631	0.00123069	0.0206851	0.0208441	0.0211738	0.0205123	0.0319987	0.0206851	0.0208441	0.0211738	0.0205123	0.00129515	0.00129515	0.00127631	0.00123069	0.0122703
36	0.0429506	0.0420243	0.0423259	0.0408131	0.0352484	0.0355194	0.0360812	0.034954	0.031998	0.0352484	0.0355194	0.0360812	0.034954	0.0429506	0.0429506	0.0423259	0.0408131	0.0383975
37	1.20049e-10	6.98831e-11	6.08592e-11	6.04967e-11	3.40139e-10	2.52889e-10	1.83602e-10	1.26419e-10	3.49233e-10	3.40139e-10	2.52889e-10	1.83602e-10	1.26419e-10	1.20049e-10	1.20049e-10	6.08592e-11	6.04967e-11	1.66357e-10
