# Supplementary material for: Error Distribution of a 5-Axis Measuring Machine Based on Sensitivity Analysis of Geometric Errors
Source: Hindawi journal article supplement (doi:10.1155/2020/8146975), 2020-02-14
Supplement: f1 [file 8146975.f1.zip › 8146975.f1/The Y directional sensitivity indices of geometric errors after error distribution.xlsx]

## Sheet: Sheet1
	1	2	3	4	5	6	7	8	9	10	11	12	13	14	15	16	17	Mean
1	4.078e-09	4.53312e-09	4.51406e-09	3.5827e-09	4.46324e-09	5.46929e-09	3.32442e-09	3.43365e-09	4.46632e-09	4.46324e-09	5.46929e-09	3.32442e-09	3.43365e-09	4.078e-09	4.53312e-09	4.51406e-09	3.5827e-09	4.19196e-09
2	2.03078e-07	2.07188e-07	1.91153e-07	1.94422e-07	1.91085e-07	1.93775e-07	1.85953e-07	1.8804e-07	1.84936e-07	1.91085e-07	1.93775e-07	1.85953e-07	1.8804e-07	2.03078e-07	2.07188e-07	1.91153e-07	1.94422e-07	1.93784e-07
3	3.57329e-08	3.23848e-08	3.03107e-08	2.30155e-08	5.48454e-08	6.85863e-08	3.48484e-08	4.59925e-08	1.03646e-07	5.48454e-08	6.85863e-08	3.48484e-08	4.59925e-08	3.57329e-08	3.23848e-08	3.03107e-08	2.30155e-08	4.44164e-08
4	0.169287	0.168547	0.170097	0.169348	0.166212	0.166934	0.166729	0.167453	0.165405	0.166212	0.166934	0.166729	0.167453	0.169287	0.168547	0.170097	0.169348	0.167919
5	1.39885e-06	1.20408e-06	1.29713e-06	1.31648e-06	1.32821e-06	1.23539e-06	1.2633e-06	1.30841e-06	8.05536e-10	1.32821e-06	1.23539e-06	1.2633e-06	1.30841e-06	1.39885e-06	1.20408e-06	1.29713e-06	1.31648e-06	1.21791e-06
6	1.99348e-06	0.000381808	2.02547e-06	0.000383648	0.000376523	1.97757e-06	0.000377708	2.00023e-06	0.000430439	0.000376523	1.97757e-06	0.000377708	2.00023e-06	1.99348e-06	0.000381808	2.02547e-06	0.000383648	0.000205047
7	2.25764e-09	2.30445e-09	3.50474e-09	2.62276e-09	2.01589e-09	2.14743e-09	1.33032e-09	8.63368e-10	9.74197e-10	2.01589e-09	2.14743e-09	1.33032e-09	8.63368e-10	2.25764e-09	2.30445e-09	3.50474e-09	2.62276e-09	2.06279e-09
8	7.5713e-07	7.56909e-07	7.59585e-07	7.58153e-07	7.4227e-07	7.48307e-07	7.43673e-07	7.48961e-07	7.38792e-07	7.4227e-07	7.48307e-07	7.43673e-07	7.48961e-07	7.5713e-07	7.56909e-07	7.59585e-07	7.58153e-07	7.51104e-07
9	4.19295e-08	3.96215e-08	5.54933e-08	5.11241e-08	4.17158e-08	4.14747e-08	4.81601e-08	4.66617e-08	4.44255e-08	4.17158e-08	4.14747e-08	4.81601e-08	4.66617e-08	4.19295e-08	3.96215e-08	5.54933e-08	5.11241e-08	4.56934e-08
10	0.175952	0.175183	0.176795	0.176016	0.172757	0.173507	0.173294	0.174047	0.171918	0.172757	0.173507	0.173294	0.174047	0.175952	0.175183	0.176795	0.176016	0.17453
11	4.85025e-09	7.31652e-09	1.74147e-08	2.17724e-08	8.37856e-09	1.162e-08	1.73645e-08	2.19038e-08	1.57143e-08	8.37856e-09	1.162e-08	1.73645e-08	2.19038e-08	4.85025e-09	7.31652e-09	1.74147e-08	2.17724e-08	1.39386e-08
12	5.13897e-06	0.000975221	5.0773e-06	0.000979765	0.000961731	5.09529e-06	0.000964618	5.00542e-06	0.00109936	0.000961731	5.09529e-06	0.000964618	5.00542e-06	5.13897e-06	0.000975221	5.0773e-06	0.000979765	0.000523686
13	0.175785	0.175016	0.176626	0.175848	0.172592	0.173341	0.173128	0.173881	0.171754	0.172592	0.173341	0.173128	0.173881	0.175785	0.175016	0.176626	0.175848	0.174364
14	7.88902e-06	0.00152297	7.9256e-06	0.00153021	0.00150188	7.77958e-06	0.00150654	7.8013e-06	0.0017169	0.00150188	7.77958e-06	0.00150654	7.8013e-06	7.88902e-06	0.00152297	7.9256e-06	0.00153021	0.000817816
15	1.41703e-07	1.41088e-07	1.42139e-07	1.41424e-07	1.39966e-07	1.39929e-07	1.39633e-07	1.39532e-07	1.69761e-09	1.39966e-07	1.39929e-07	1.39633e-07	1.39532e-07	1.41703e-07	1.41088e-07	1.42139e-07	1.41424e-07	1.32501e-07
16	4.73422e-08	4.71921e-08	4.76659e-08	4.72914e-08	4.64735e-08	4.67507e-08	4.63275e-08	4.64615e-08	1.82904e-07	4.64735e-08	4.67507e-08	4.63275e-08	4.64615e-08	4.73422e-08	4.71921e-08	4.76659e-08	4.72914e-08	5.49361e-08
17	4.76098e-10	5.26091e-10	5.95873e-10	4.6596e-10	4.01973e-10	4.67309e-10	2.26866e-10	1.7572e-10	2.17491e-10	4.01973e-10	4.67309e-10	2.26866e-10	1.7572e-10	4.76098e-10	5.26091e-10	5.95873e-10	4.6596e-10	4.05251e-10
18	0.00617131	0.00614433	0.00620086	0.00617355	0.00605925	0.00608554	0.00607807	0.00610448	0.0241193	0.00605925	0.00608554	0.00607807	0.00610448	0.00617131	0.00614433	0.00620086	0.00617355	0.00718553
19	0.0185112	0.0184246	0.018594	0.018518	0.0181739	0.0182494	0.0182266	0.01831	1.03994e-09	0.0181739	0.0182494	0.0182266	0.01831	0.0185112	0.0184246	0.018594	0.018518	0.017295
20	7.8749e-06	0.00152051	7.91103e-06	0.00152773	0.00149945	7.76558e-06	0.00150411	7.78751e-06	0.00171413	0.00149945	7.76558e-06	0.00150411	7.78751e-06	7.8749e-06	0.00152051	7.91103e-06	0.00152773	0.000816494
21	8.38799e-10	8.11041e-10	1.41142e-09	1.2217e-09	7.97583e-10	8.01363e-10	8.6695e-10	7.68225e-10	6.91063e-10	7.97583e-10	8.01363e-10	8.6695e-10	7.68225e-10	8.38799e-10	8.11041e-10	1.41142e-09	1.2217e-09	9.25014e-10
22	0.0246619	0.024554	0.0247799	0.0246708	0.024214	0.0243191	0.0242892	0.0243948	0.0240964	0.024214	0.0243191	0.0242892	0.0243948	0.0246619	0.024554	0.0247799	0.0246708	0.0244626
23	1.9691e-10	2.05271e-10	9.68295e-10	6.79068e-10	1.67392e-10	1.89749e-10	4.82964e-10	3.16869e-10	1.80051e-10	1.67392e-10	1.89749e-10	4.82964e-10	3.16869e-10	1.9691e-10	2.05271e-10	9.68295e-10	6.79068e-10	3.87829e-10
24	1.86689e-07	1.8584e-07	1.8836e-07	1.87301e-07	1.83263e-07	1.84018e-07	1.84166e-07	1.848e-07	1.82369e-07	1.83263e-07	1.84018e-07	1.84166e-07	1.848e-07	1.86689e-07	1.8584e-07	1.8836e-07	1.87301e-07	1.85367e-07
25	3.02653e-10	2.93955e-10	9.90318e-10	7.99111e-10	2.50727e-10	2.93713e-10	5.35438e-10	4.63985e-10	1.64868e-10	2.50727e-10	2.93713e-10	5.35438e-10	4.63985e-10	3.02653e-10	2.93955e-10	9.90318e-10	7.99111e-10	4.72039e-10
26	0.0140998	0.0140381	0.00739017	0.00735762	0.0461384	0.0463386	0.0375461	0.0377092	0.0596057	0.0461384	0.0463386	0.0375461	0.0377092	0.0140998	0.0140381	0.00739017	0.00735762	0.0282848
27	2.83991e-10	2.45572e-10	1.30052e-09	1.07209e-09	2.21422e-10	1.69474e-10	6.75024e-10	5.05263e-10	2.53058e-10	2.21422e-10	1.69474e-10	6.75024e-10	5.05263e-10	2.83991e-10	2.45572e-10	1.30052e-09	1.07209e-09	5.41162e-10
28	0.028753	0.0286273	0.0309061	0.03077	0.0097691	0.00981149	0.0154878	0.0155551	0.000273912	0.0097691	0.00981149	0.0154878	0.0155551	0.028753	0.0286273	0.0309061	0.03077	0.0199784
29	2.05595e-08	1.97986e-08	2.06194e-08	1.97052e-08	2.04337e-08	1.99905e-08	2.02459e-08	1.97041e-08	2.02238e-08	2.04337e-08	1.99905e-08	2.02459e-08	1.97041e-08	2.05595e-08	1.97986e-08	2.06194e-08	1.97052e-08	2.01375e-08
30	7.0164e-10	7.71195e-10	1.60588e-09	1.46267e-09	4.93479e-10	3.06275e-10	1.07118e-09	7.50944e-10	1.08263e-09	4.93479e-10	3.06275e-10	1.07118e-09	7.50944e-10	7.0164e-10	7.71195e-10	1.60588e-09	1.46267e-09	9.06422e-10
31	1.86712e-07	1.85968e-07	1.88622e-07	1.87651e-07	1.83042e-07	1.83805e-07	1.84152e-07	1.84783e-07	1.82175e-07	1.83042e-07	1.83805e-07	1.84152e-07	1.84783e-07	1.86712e-07	1.85968e-07	1.88622e-07	1.87651e-07	1.85391e-07
32	7.75823e-10	6.89432e-10	1.83873e-09	1.5794e-09	6.99863e-10	6.42877e-10	1.22567e-09	1.06248e-09	7.62168e-10	6.99863e-10	6.42877e-10	1.22567e-09	1.06248e-09	7.75823e-10	6.89432e-10	1.83873e-09	1.5794e-09	1.04651e-09
33	0.191625	0.190787	0.192542	0.191694	0.188145	0.188962	0.18873	0.18955	0.187232	0.188145	0.188962	0.18873	0.18955	0.191625	0.190787	0.192542	0.191694	0.190076
34	2.58202e-09	2.44738e-09	3.44286e-09	3.04195e-09	2.53826e-09	2.36593e-09	2.95558e-09	2.61553e-09	2.47188e-09	2.53826e-09	2.36593e-09	2.95558e-09	2.61553e-09	2.58202e-09	2.44738e-09	3.44286e-09	3.04195e-09	2.73241e-09
35	0.00175116	0.0017435	0.00175967	0.00175192	0.00171901	0.00172647	0.00172443	0.00173193	0.00171056	0.00171901	0.00172647	0.00172443	0.00173193	0.00175116	0.0017435	0.00175967	0.00175192	0.00173687
36	0.179637	0.178851	0.193067	0.192217	0.0610551	0.06132	0.0967239	0.0971442	0.00170569	0.0610551	0.06132	0.0967239	0.0971442	0.179637	0.178851	0.193067	0.192217	0.124808
37	0.0137414	0.0136813	0.00121676	0.0012114	0.128822	0.129381	0.0936874	0.0940944	0.187216	0.128822	0.129381	0.0936874	0.0940944	0.0137414	0.0136813	0.00121676	0.0012114	0.0669934
