# Supplementary material for: Error Distribution of a 5-Axis Measuring Machine Based on Sensitivity Analysis of Geometric Errors
Source: Hindawi journal article supplement (doi:10.1155/2020/8146975), 2020-02-14
Supplement: f1 [file 8146975.f1.zip › 8146975.f1/The Y directional sensitivity indices of geometric errors before error distribution.xlsx]

## Sheet: Sheet1
	1	2	3	4	5	6	7	8	9	10	11	12	13	14	15	16	17	Mean
1	9.13818e-09	8.99953e-09	8.04144e-09	7.1209e-09	8.27227e-09	8.28879e-09	6.96571e-09	6.48775e-09	7.16257e-09	8.27227e-09	8.28879e-09	6.48775e-09	6.48775e-09	9.13818e-09	8.99953e-09	8.04144e-09	7.1209e-09	7.84199e-09
2	8.88927e-08	9.12892e-08	8.50418e-08	8.69428e-08	7.95085e-08	8.09318e-08	8.11509e-08	8.22532e-08	7.80246e-08	7.95085e-08	8.09318e-08	8.22532e-08	8.22532e-08	8.88927e-08	9.12892e-08	8.50418e-08	8.69428e-08	8.41852e-08
3	1.84825e-08	1.84946e-08	1.47177e-08	1.23246e-08	3.19372e-08	3.86857e-08	2.10303e-08	2.62904e-08	5.28891e-08	3.19372e-08	3.86857e-08	2.62904e-08	2.62904e-08	1.84825e-08	1.84946e-08	1.47177e-08	1.23246e-08	2.4828e-08
4	0.457711	0.45651	0.463657	0.462422	0.439797	0.440914	0.443373	0.444506	0.434733	0.439797	0.440914	0.444506	0.444506	0.457711	0.45651	0.463657	0.462422	0.450215
5	6.17413e-07	5.11062e-07	5.58694e-07	5.8435e-07	5.62594e-07	5.22381e-07	5.26133e-07	5.69089e-07	9.26296e-10	5.62594e-07	5.22381e-07	5.69089e-07	5.69089e-07	6.17413e-07	5.11062e-07	5.58694e-07	5.8435e-07	5.26312e-07
6	3.42753e-06	0.000661815	3.48744e-06	0.000670404	0.000637591	3.30907e-06	0.000642785	3.34766e-06	0.000724005	0.000637591	3.30907e-06	3.34766e-06	3.34766e-06	3.42753e-06	0.000661815	3.48744e-06	0.000670404	0.000313935
7	1.59076e-09	1.56884e-09	3.68872e-09	3.07595e-09	1.23367e-09	1.17772e-09	2.14138e-09	1.72036e-09	1.0121e-09	1.23367e-09	1.17772e-09	1.72036e-09	1.72036e-09	1.59076e-09	1.56884e-09	3.68872e-09	3.07595e-09	1.94035e-09
8	3.30202e-07	3.30918e-07	3.34053e-07	3.34024e-07	3.16458e-07	3.18556e-07	3.1887e-07	3.20524e-07	3.12827e-07	3.16458e-07	3.18556e-07	3.20524e-07	3.20524e-07	3.30202e-07	3.30918e-07	3.34053e-07	3.34024e-07	3.24805e-07
9	1.12309e-07	1.09245e-07	1.36864e-07	1.32425e-07	1.10434e-07	1.08555e-07	1.24671e-07	1.22017e-07	1.13959e-07	1.10434e-07	1.08555e-07	1.22017e-07	1.22017e-07	1.12309e-07	1.09245e-07	1.36864e-07	1.32425e-07	1.19079e-07
10	0.118933	0.118621	0.120478	0.120157	0.114279	0.114569	0.115207	0.115502	0.112963	0.114279	0.114569	0.115502	0.115502	0.118933	0.118621	0.120478	0.120157	0.116985
11	2.40732e-09	3.47175e-09	1.07913e-08	1.30677e-08	5.08845e-09	6.68502e-09	1.17197e-08	1.4112e-08	1.02416e-08	5.08845e-09	6.68502e-09	1.4112e-08	1.4112e-08	2.40732e-09	3.47175e-09	1.07913e-08	1.30677e-08	8.6659e-09
12	3.45463e-06	0.000660328	3.46143e-06	0.000668838	0.000636155	3.33412e-06	0.000641284	3.31613e-06	0.000722339	0.000636155	3.33412e-06	3.31613e-06	3.31613e-06	3.45463e-06	0.000660328	3.46143e-06	0.000668838	0.000313218
13	0.11882	0.118508	0.120363	0.120043	0.11417	0.11446	0.115098	0.115392	0.112855	0.11417	0.11446	0.115392	0.115392	0.11882	0.118508	0.120363	0.120043	0.116874
14	3.41295e-06	0.000659996	3.45715e-06	0.000668542	0.000635834	3.28743e-06	0.000641002	3.31349e-06	0.000722001	0.000635834	3.28743e-06	3.31349e-06	3.31349e-06	3.41295e-06	0.000659996	3.45715e-06	0.000668542	0.000313059
15	6.20484e-08	6.18788e-08	6.29241e-08	6.2732e-08	6.00525e-08	5.97471e-08	6.03573e-08	6.0039e-08	1.49385e-09	6.00525e-08	5.97471e-08	6.0039e-08	6.0039e-08	6.20484e-08	6.18788e-08	6.29241e-08	6.2732e-08	5.76902e-08
16	2.0814e-08	2.07854e-08	2.13065e-08	2.1166e-08	1.99311e-08	2.00011e-08	2.01085e-08	2.01103e-08	7.71686e-08	1.99311e-08	2.00011e-08	2.01103e-08	2.01103e-08	2.0814e-08	2.07854e-08	2.13065e-08	2.1166e-08	2.38598e-08
17	2.38678e-10	2.74053e-10	4.93896e-10	4.34518e-10	1.63006e-10	1.92227e-10	2.73662e-10	2.44092e-10	1.38294e-10	1.63006e-10	1.92227e-10	2.44092e-10	2.44092e-10	2.38678e-10	2.74053e-10	4.93896e-10	4.34518e-10	2.78646e-10
18	0.00266973	0.00266272	0.00270441	0.0026972	0.00256525	0.00257176	0.0025861	0.00259271	0.0101428	0.00256525	0.00257176	0.00259271	0.00259271	0.00266973	0.00266272	0.00270441	0.0026972	0.00307348
19	0.00800797	0.00798449	0.00810945	0.00809043	0.00769407	0.00771221	0.00775503	0.00777663	4.73694e-10	0.00769407	0.00771221	0.00777663	0.00777663	0.00800797	0.00798449	0.00810945	0.00809043	0.00742836
20	3.40687e-06	0.000658929	3.45048e-06	0.000667459	0.000634806	3.28171e-06	0.000639968	3.30775e-06	0.000720836	0.000634806	3.28171e-06	3.30775e-06	3.30775e-06	3.40687e-06	0.000658929	3.45048e-06	0.000667459	0.000312553
21	6.55194e-10	6.50306e-10	9.96703e-10	9.04888e-10	5.80519e-10	5.78695e-10	6.77342e-10	6.21822e-10	5.15849e-10	5.80519e-10	5.78695e-10	6.21822e-10	6.21822e-10	6.55194e-10	6.50306e-10	9.96703e-10	9.04888e-10	6.93604e-10
22	0.0106688	0.0106408	0.0108074	0.0107786	0.0102513	0.0102773	0.0103346	0.010361	0.0101332	0.0102513	0.0102773	0.010361	0.010361	0.0106688	0.0106408	0.0108074	0.0107786	0.0104941
23	1.18226e-10	8.47585e-11	8.12511e-10	6.15681e-10	1.31255e-10	8.34349e-11	5.01385e-10	3.53061e-10	1.85671e-10	1.31255e-10	8.34349e-11	3.53061e-10	3.53061e-10	1.18226e-10	8.47585e-11	8.12511e-10	6.15681e-10	3.19881e-10
24	8.07901e-08	8.05686e-08	8.25019e-08	8.21554e-08	7.76376e-08	7.78066e-08	7.8629e-08	7.87281e-08	7.68106e-08	7.76376e-08	7.78066e-08	7.87281e-08	7.87281e-08	8.07901e-08	8.05686e-08	8.25019e-08	8.21554e-08	7.96791e-08
25	1.66561e-10	1.38442e-10	7.75628e-10	6.43968e-10	1.6401e-10	1.44449e-10	4.95078e-10	4.12488e-10	1.80171e-10	1.6401e-10	1.44449e-10	4.12488e-10	4.12488e-10	1.66561e-10	1.38442e-10	7.75628e-10	6.43968e-10	3.51696e-10
26	0.0381225	0.0380224	0.0201444	0.0200907	0.122082	0.122392	0.0998442	0.100099	0.156661	0.122082	0.122392	0.100099	0.100099	0.0381225	0.0380224	0.0201444	0.0200907	0.0752066
27	1.82788e-10	1.59234e-10	1.13527e-09	9.92403e-10	1.75405e-10	1.3142e-10	6.96522e-10	5.80435e-10	2.78676e-10	1.75405e-10	1.3142e-10	5.80435e-10	5.80435e-10	1.82788e-10	1.59234e-10	1.13527e-09	9.92403e-10	4.86444e-10
28	0.0777413	0.0775372	0.084245	0.0840205	0.025849	0.0259146	0.0411858	0.0412911	0.00071992	0.025849	0.0259146	0.0412911	0.0412911	0.0777413	0.0775372	0.084245	0.0840205	0.0539055
29	1.38573e-08	1.34607e-08	1.41336e-08	1.36473e-08	1.35067e-08	1.32383e-08	1.35838e-08	1.32608e-08	1.33138e-08	1.35067e-08	1.32383e-08	1.32608e-08	1.32608e-08	1.38573e-08	1.34607e-08	1.41336e-08	1.36473e-08	1.35511e-08
30	4.46339e-10	4.81984e-10	1.16825e-09	1.08054e-09	3.26656e-10	2.29915e-10	8.23466e-10	6.50728e-10	6.50785e-10	3.26656e-10	2.29915e-10	6.50728e-10	6.50728e-10	4.46339e-10	4.81984e-10	1.16825e-09	1.08054e-09	6.40813e-10
31	8.08839e-08	8.07193e-08	8.27193e-08	8.24202e-08	7.76163e-08	7.77917e-08	7.87134e-08	7.88132e-08	7.68097e-08	7.76163e-08	7.77917e-08	7.88132e-08	7.88132e-08	8.08839e-08	8.07193e-08	8.27193e-08	8.24202e-08	7.97802e-08
32	4.49867e-10	4.27932e-10	1.34648e-09	1.26265e-09	4.76353e-10	4.17694e-10	9.61715e-10	8.66648e-10	5.99542e-10	4.76353e-10	4.17694e-10	8.66648e-10	8.66648e-10	4.49867e-10	4.27932e-10	1.34648e-09	1.26265e-09	7.60186e-10
33	0.0828972	0.0826796	0.083974	0.0837503	0.0796531	0.0798553	0.0803005	0.0805058	0.078736	0.0796531	0.0798553	0.0805058	0.0805058	0.0828972	0.0826796	0.083974	0.0837503	0.0815396
34	5.96604e-09	5.86343e-09	6.69969e-09	6.43982e-09	5.7962e-09	5.68342e-09	6.21558e-09	6.00634e-09	5.76564e-09	5.7962e-09	5.68342e-09	6.00634e-09	6.00634e-09	5.96604e-09	5.86343e-09	6.69969e-09	6.43982e-09	6.05279e-09
35	0.000757556	0.000755568	0.000767452	0.000765407	0.000727761	0.000729609	0.000733711	0.000735586	0.000719337	0.000727761	0.000729609	0.000735586	0.000735586	0.000757556	0.000755568	0.000767452	0.000765407	0.000745089
36	0.0777111	0.0775072	0.0842032	0.0839789	0.0258482	0.0259139	0.041154	0.0412592	0.000717287	0.0258482	0.0259139	0.0412592	0.0412592	0.0777111	0.0775072	0.0842032	0.0839789	0.0538808
37	0.00594453	0.00592893	0.000530666	0.000529252	0.0545379	0.0546764	0.0398619	0.0399639	0.0787294	0.0545379	0.0546764	0.0399639	0.0399639	0.00594453	0.00592893	0.000530666	0.000529252	0.0283987
