# Supplementary material for: Error Distribution of a 5-Axis Measuring Machine Based on Sensitivity Analysis of Geometric Errors
Source: Hindawi journal article supplement (doi:10.1155/2020/8146975), 2020-02-14
Supplement: f1 [file 8146975.f1.zip › 8146975.f1/The Z directional sensitivity indices of geometric errors after error distribution.xlsx]

## Sheet: Sheet1
	1	2	3	4	5	6	7	8	9	10	11	12	13	14	15	16	17	Mean
1	3.94854e-09	2.94452e-09	6.48274e-09	8.46747e-09	2.7277e-09	1.92597e-09	5.75212e-09	7.57589e-09	3.65655e-09	2.56924e-09	1.81458e-09	5.97934e-09	7.82213e-09	3.52734e-09	2.598e-09	6.86488e-09	8.83701e-09	4.91141e-09
2	2.37189e-08	2.91357e-08	1.19451e-08	8.52221e-09	8.99362e-09	1.29251e-08	1.10031e-08	7.4427e-09	5.81616e-10	7.80131e-09	1.15583e-08	1.22254e-08	8.45567e-09	2.12709e-08	2.66018e-08	1.40283e-08	1.03447e-08	1.33267e-08
3	1.14065e-06	1.13441e-06	1.15424e-06	1.11923e-06	1.60651e-06	1.61148e-06	1.45374e-06	1.40192e-06	1.97106e-06	1.65201e-06	1.6573e-06	1.41028e-06	1.36147e-06	1.22049e-06	1.21331e-06	1.0801e-06	1.04938e-06	1.36692e-06
4	0.0509502	0.067926	0.0880225	0.107351	0.0907082	0.0800256	0.105609	0.128731	0.149428	0.0932955	0.0823168	0.102386	0.124936	0.0545869	0.0727449	0.0822628	0.100522	0.0930472
5	1.20496e-06	0.000206323	1.32401e-06	0.000204682	0.000293686	1.75355e-06	0.000265284	1.60546e-06	0.000414144	0.000302066	1.80688e-06	0.000257191	1.56142e-06	1.29484e-06	0.000220964	1.24258e-06	0.000191667	0.000139282
6	2.07139e-08	3.74279e-08	2.33462e-09	3.20645e-09	3.07576e-09	1.31493e-08	6.78452e-09	2.65204e-09	1.55619e-09	2.63183e-09	1.24388e-08	7.32862e-09	2.84414e-09	1.97432e-08	3.68387e-08	2.83699e-09	2.93697e-09	1.05e-08
7	7.97502e-09	6.5954e-09	1.30173e-08	1.43391e-08	1.77179e-09	1.51345e-09	1.21583e-08	1.35491e-08	3.51076e-09	1.52514e-09	1.2887e-09	1.25283e-08	1.39284e-08	7.40276e-09	6.04074e-09	1.35071e-08	1.48284e-08	8.55764e-09
8	1.69424e-09	1.4531e-09	2.83711e-09	3.2296e-09	3.43568e-10	3.55526e-11	2.91324e-09	3.42373e-09	1.0846e-09	2.66239e-10	2.08264e-11	3.08077e-09	3.5688e-09	1.47776e-09	1.21783e-09	3.09892e-09	3.45655e-09	1.95308e-09
9	2.91688e-07	2.93642e-07	3.15815e-07	3.14367e-07	4.17775e-07	4.17117e-07	3.93867e-07	3.89483e-07	5.29527e-07	4.29814e-07	4.29213e-07	3.82373e-07	3.78584e-07	3.12382e-07	3.14479e-07	2.96057e-07	2.95363e-07	3.64797e-07
10	0.00210658	0.000638198	0.0021405	0.000632819	0.000908391	0.00299226	0.000820276	0.00259747	0.000734562	0.000934302	0.00307793	0.00079524	0.0025209	0.00225694	0.000683473	0.00200044	0.000592564	0.00155487
11	4.29107e-06	0.000823353	4.3385e-06	0.000816408	0.0011719	6.06308e-06	0.00105823	5.28443e-06	0.00165246	0.00120533	6.23693e-06	0.00102593	5.12998e-06	4.59482e-06	0.000881762	4.05509e-06	0.000764473	0.000555286
12	3.73111e-08	3.74103e-08	2.55993e-07	2.55112e-07	3.92641e-09	4.04933e-09	2.75527e-07	2.71178e-07	1.35474e-07	3.05906e-09	3.20392e-09	2.77281e-07	2.73037e-07	3.08275e-08	3.10381e-08	2.56971e-07	2.56175e-07	1.41622e-07
13	0.0130842	0.00185462	0.000520669	0.00868085	0.00502357	0.0118002	0.000102068	0.00791729	0.0007339	0.00516686	0.012138	9.89571e-05	0.00768389	0.0140181	0.00198619	0.000486606	0.00812863	0.0058485
14	5.48998e-09	5.0058e-09	8.65424e-09	8.89822e-09	1.51269e-09	1.25627e-09	8.35006e-09	8.5556e-09	2.63035e-09	1.3523e-09	1.10578e-09	8.61055e-09	8.82044e-09	5.0924e-09	4.61065e-09	9.00772e-09	9.25615e-09	5.77701e-09
15	2.45349e-09	2.05819e-09	3.18632e-09	3.59037e-09	5.92475e-10	3.64027e-10	3.42114e-09	3.84307e-09	1.28773e-09	5.24607e-10	3.11636e-10	3.54579e-09	3.97006e-09	2.26792e-09	1.87957e-09	3.36595e-09	3.76866e-09	2.3783e-09
16	1.84239e-09	1.94157e-09	1.97084e-09	2.34715e-09	6.59125e-10	5.19177e-10	2.10041e-09	2.16438e-09	8.45678e-10	5.8165e-10	4.42639e-10	2.17195e-09	2.2352e-09	1.67217e-09	1.78585e-09	2.08514e-09	2.4399e-09	1.6356e-09
17	2.82205e-07	2.80481e-07	2.86778e-07	2.78432e-07	3.97529e-07	3.98931e-07	3.60239e-07	3.4776e-07	4.87874e-07	4.088e-07	4.10287e-07	3.49358e-07	3.37622e-07	3.02119e-07	3.00159e-07	2.68216e-07	2.60923e-07	3.38689e-07
18	0.000659135	0.000655392	0.000669775	0.000649891	0.000932872	0.000936266	0.000842405	0.00081276	0.00114509	0.000959482	0.000963073	0.000816694	0.000788801	0.000706182	0.000701888	0.00062595	0.000608549	0.0007926
19	0.00263555	0.00262059	0.00267832	0.0025988	0.00373016	0.00374373	0.0033686	0.00325005	0.00457887	0.00383656	0.00385092	0.00326578	0.00315424	0.00282367	0.0028065	0.00250306	0.00243348	0.00316935
20	1.23836e-09	9.43476e-10	3.65027e-09	4.4466e-09	3.65918e-10	4.57178e-10	3.60333e-09	4.48926e-09	1.90238e-09	3.28283e-10	4.46863e-10	3.68622e-09	4.56907e-09	1.07942e-09	8.10628e-10	3.74398e-09	4.52696e-09	2.36989e-09
21	1.18223e-05	0.00228025	1.20123e-05	0.00226102	0.00324565	1.67916e-05	0.00293081	1.45769e-05	0.00457656	0.00333823	1.72723e-05	0.00284136	1.41473e-05	1.26659e-05	0.00244202	1.12265e-05	0.00211719	0.00153786
22	0.0032807	0.000993907	0.00333353	0.000985522	0.00141469	0.00466003	0.00127747	0.00404519	0.00114398	0.00145505	0.00479345	0.00123848	0.00392594	0.00351486	0.00106442	0.0031154	0.000922828	0.0024215
23	1.18644e-09	8.98299e-10	9.26552e-10	1.15086e-09	3.45841e-10	2.36481e-10	9.40399e-10	1.18811e-09	2.77439e-10	2.99835e-10	1.97539e-10	1.00898e-09	1.26082e-09	1.07542e-09	7.92022e-10	1.03522e-09	1.26348e-09	8.28455e-10
24	8.73267e-10	6.04614e-10	6.08681e-10	8.22037e-10	2.6252e-10	1.55177e-10	6.17471e-10	8.57636e-10	1.94433e-10	2.26511e-10	1.26422e-10	6.62491e-10	9.07974e-10	7.90362e-10	5.27956e-10	6.79719e-10	8.9903e-10	5.77429e-10
25	2.80934e-07	2.79088e-07	2.85159e-07	2.76922e-07	3.96598e-07	3.9795e-07	3.58514e-07	3.46161e-07	4.86689e-07	4.07869e-07	4.09311e-07	3.47634e-07	3.3603e-07	3.00845e-07	2.9877e-07	2.66607e-07	2.59431e-07	3.37324e-07
26	0.140267	0.139471	0.142526	0.138295	0.198519	0.199241	0.179262	0.172954	0.243677	0.204182	0.204946	0.173791	0.167855	0.150279	0.149365	0.1332	0.129497	0.168666
27	0.172754	0.171773	0.187781	0.182206	0.0846066	0.0849143	0.120747	0.116498	0.00292604	0.0870199	0.0873454	0.117062	0.113063	0.185084	0.183959	0.175493	0.170615	0.131991
28	9.34187e-10	6.85354e-10	8.13948e-10	1.08106e-09	3.40287e-10	2.52594e-10	8.4861e-10	1.15848e-09	4.31732e-10	3.10055e-10	2.31903e-10	8.96468e-10	1.21049e-09	8.57915e-10	6.18455e-10	8.89498e-10	1.16055e-09	7.48329e-10
29	0.104893	0.104297	0.0425094	0.0412473	0.048365	0.0485409	0.0327311	0.0315792	0.0011428	0.0212206	0.0213	0.0622541	0.0601278	0.0410029	0.0407535	0.105162	0.102238	0.053492
30	2.72455e-07	2.73716e-07	2.76261e-07	2.72084e-07	1.69265e-07	1.64544e-07	1.52399e-07	1.43351e-07	6.85145e-09	1.74022e-07	1.69223e-07	1.47782e-07	1.39194e-07	2.91766e-07	2.93064e-07	2.58287e-07	2.54932e-07	2.03482e-07
31	9.42228e-10	6.16771e-10	5.21024e-10	7.98268e-10	2.7822e-10	1.50184e-10	5.30877e-10	8.51904e-10	1.71253e-10	2.42906e-10	1.23512e-10	5.72141e-10	8.95894e-10	8.69983e-10	5.46077e-10	5.86393e-10	8.65164e-10	5.62518e-10
32	9.75618e-09	9.12853e-09	9.19518e-09	9.30252e-09	2.33324e-07	2.3396e-07	2.10863e-07	2.03965e-07	4.87154e-07	2.39883e-07	2.4065e-07	2.0449e-07	1.98086e-07	1.01818e-08	9.63785e-09	8.69293e-09	8.9208e-09	1.36894e-07
33	0.00507672	0.00504789	0.00515837	0.00500522	0.139823	0.140332	0.12626	0.121816	0.292471	0.143811	0.144349	0.122406	0.118225	0.00543905	0.00540597	0.00482081	0.00468679	0.0817726
34	0.172669	0.171689	0.187684	0.182112	0.0845661	0.0848737	0.120684	0.116437	0.00292417	0.0869783	0.0873037	0.117001	0.113005	0.184994	0.183869	0.175403	0.170527	0.131925
35	0.163264	0.162337	0.165905	0.160979	0.0984373	0.0987953	0.0888982	0.0857697	4.67264e-10	0.101245	0.101624	0.0861848	0.0832412	0.174917	0.173853	0.155049	0.150738	0.120661
36	4.95479e-09	4.61022e-09	4.58719e-09	4.72001e-09	5.86914e-09	5.77394e-09	5.61969e-09	5.73539e-09	6.99746e-09	5.99004e-09	5.90219e-09	5.51665e-09	5.64852e-09	5.15221e-09	4.81058e-09	4.40639e-09	4.56058e-09	5.34441e-09
37	0.16834	0.167385	0.171051	0.165973	0.238251	0.239117	0.21514	0.207568	0.292447	0.245046	0.245963	0.208573	0.201449	0.180356	0.179259	0.159859	0.155414	0.202423
