# Supplementary material for: Error Distribution of a 5-Axis Measuring Machine Based on Sensitivity Analysis of Geometric Errors
Source: Hindawi journal article supplement (doi:10.1155/2020/8146975), 2020-02-14
Supplement: f1 [file 8146975.f1.zip › 8146975.f1/The Z directional sensitivity indices of geometric errors before error distribution.xlsx]

## Sheet: Sheet1
	1	2	3	4	5	6	7	8	9	10	11	12	13	14	15	16	17	Mean
1	4.55008e-09	3.89283e-09	5.97125e-09	7.60947e-09	4.31402e-09	3.4789e-09	5.46123e-09	6.80601e-09	4.8627e-09	4.18935e-09	3.37749e-09	5.55501e-09	6.91889e-09	4.21623e-09	3.66074e-09	6.14451e-09	7.75032e-09	5.22112e-09
2	3.63178e-08	3.92071e-08	1.45851e-09	1.03906e-09	2.20767e-08	2.59423e-08	7.91736e-10	7.46641e-10	4.41173e-09	2.02063e-08	2.39928e-08	1.13239e-09	8.76232e-10	3.38823e-08	3.68059e-08	2.53722e-09	1.78874e-09	1.48949e-08
3	4.62651e-07	4.47204e-07	4.53889e-07	4.27284e-07	5.87595e-07	6.00471e-07	5.33075e-07	4.99258e-07	6.43023e-07	6.11232e-07	6.25199e-07	5.10105e-07	4.79037e-07	5.14666e-07	4.95328e-07	4.09908e-07	3.88048e-07	5.11057e-07
4	0.126293	0.163292	0.215689	0.255397	0.204882	0.184179	0.241368	0.285759	0.303374	0.213439	0.192052	0.230742	0.273937	0.141218	0.181822	0.194349	0.231455	0.214073
5	4.75162e-06	0.000881193	4.81909e-06	0.00086476	0.00117847	6.28167e-06	0.00107682	5.29497e-06	0.00149365	0.00122769	6.55225e-06	0.00102941	5.07817e-06	5.31571e-06	0.000981196	4.34614e-06	0.000783697	0.000562314
6	1.97224e-08	2.84113e-08	7.93363e-10	2.01876e-09	6.38557e-09	1.34739e-08	1.27235e-09	1.14012e-09	3.86498e-10	5.71601e-09	1.26816e-08	1.5869e-09	1.1233e-09	1.89375e-08	2.79987e-08	1.03668e-09	1.61939e-09	8.48849e-09
7	7.82539e-09	6.55616e-09	5.71685e-09	6.26146e-09	2.84973e-09	2.67728e-09	4.46533e-09	4.99829e-09	6.83165e-10	2.51106e-09	2.34732e-09	4.80158e-09	5.34691e-09	7.28408e-09	6.00326e-09	6.24041e-09	6.79509e-09	4.90373e-09
8	1.91876e-09	1.74948e-09	1.41046e-09	1.69075e-09	7.80346e-10	3.44642e-10	1.20412e-09	1.54919e-09	4.38935e-10	6.50544e-10	2.55147e-10	1.3344e-09	1.65626e-09	1.65946e-09	1.47908e-09	1.63792e-09	1.87825e-09	1.27281e-09
9	1.37325e-07	1.42032e-07	1.72199e-07	1.77581e-07	1.88619e-07	1.87729e-07	1.96794e-07	2.01683e-07	2.34183e-07	1.96822e-07	1.96087e-07	1.88843e-07	1.94104e-07	1.5372e-07	1.58502e-07	1.5643e-07	1.62289e-07	1.79114e-07
10	0.00130543	0.000383556	0.00131126	0.00037638	0.000512948	0.00172167	0.00046868	0.00144148	0.000372833	0.000534371	0.00179528	0.000448048	0.00138185	0.0014597	0.000427082	0.00118153	0.000341097	0.000909599
11	4.72439e-06	0.000879696	4.72384e-06	0.000863236	0.00117645	6.20306e-06	0.00107492	5.1968e-06	0.00149106	0.00122558	6.46783e-06	0.0010276	4.98253e-06	5.27944e-06	0.000979524	4.25658e-06	0.000782313	0.000561306
12	4.39735e-08	4.74202e-08	1.14776e-07	1.18482e-07	1.02968e-08	6.0595e-09	1.08724e-07	1.02231e-07	3.85307e-08	7.51721e-09	3.11272e-09	1.12588e-07	1.06203e-07	3.54725e-08	3.97959e-08	1.20262e-07	1.2345e-07	6.69938e-08
13	0.0081081	0.00111462	0.000318944	0.00516309	0.00283668	0.00678953	5.83e-05	0.00439372	0.000372484	0.00295515	0.00707978	5.57363e-05	0.00421196	0.00906629	0.00124111	0.000287393	0.00467908	0.00345482
14	5.59588e-09	5.16995e-09	3.44926e-09	3.43558e-09	2.12714e-09	2.03669e-09	2.75034e-09	2.73332e-09	3.92522e-10	1.88404e-09	1.79479e-09	2.98308e-09	2.9644e-09	5.20984e-09	4.77459e-09	3.81832e-09	3.80546e-09	3.23089e-09
15	2.79717e-09	2.51295e-09	1.31889e-09	1.47338e-09	1.18685e-09	9.99594e-10	1.20433e-09	1.35771e-09	4.30207e-10	1.0802e-09	8.98912e-10	1.2984e-09	1.45222e-09	2.6312e-09	2.34662e-09	1.47096e-09	1.62319e-09	1.53428e-09
16	2.23378e-09	2.4202e-09	7.74292e-10	1.11726e-09	1.16223e-09	1.07535e-09	7.26737e-10	7.30859e-10	4.2103e-10	1.03857e-09	9.50955e-10	7.58056e-10	7.59812e-10	2.04882e-09	2.26312e-09	8.43055e-10	1.14977e-09	1.20435e-09
17	1.13411e-07	1.09316e-07	1.12462e-07	1.06014e-07	1.44624e-07	1.47876e-07	1.31733e-07	1.2352e-07	1.58684e-07	1.50547e-07	1.54079e-07	1.25996e-07	1.18471e-07	1.26488e-07	1.21413e-07	1.01468e-07	9.62051e-08	1.26018e-07
18	0.000261438	0.000252111	0.000262639	0.000247427	0.00033717	0.00034481	0.0003081	0.000288718	0.000372022	0.000351253	0.000359552	0.000294537	0.000276776	0.000292336	0.000280723	0.000236656	0.000224234	0.000293559
19	0.00104525	0.00100796	0.00105008	0.000989255	0.00134804	0.00137858	0.00123183	0.00115434	0.00148739	0.00140434	0.00143751	0.0011776	0.00110658	0.00116877	0.00112234	0.000946188	0.000896518	0.00117368
20	1.51157e-09	1.18742e-09	1.57014e-09	2.42643e-09	6.76812e-10	5.34219e-10	8.34242e-10	1.54434e-09	1.70592e-10	5.78527e-10	4.63876e-10	9.12982e-10	1.62083e-09	1.33074e-09	1.04165e-09	1.67142e-09	2.49376e-09	1.20997e-09
21	4.68965e-06	0.000877063	4.70948e-06	0.000860663	0.00117295	6.18378e-06	0.00107173	5.17714e-06	0.00148663	0.00122194	6.44804e-06	0.00102455	4.96303e-06	5.24358e-06	0.000976595	4.24364e-06	0.000779981	0.000559633
22	0.00130114	0.000382306	0.00130696	0.000375159	0.000511275	0.00171602	0.000467157	0.00143676	0.000371631	0.000532628	0.00178938	0.000446591	0.00137732	0.0014549	0.000425691	0.00117765	0.00033999	0.000906621
23	1.24046e-09	1.00994e-09	3.93909e-10	4.68519e-10	5.01746e-10	4.37074e-10	3.39563e-10	4.14054e-10	5.87772e-11	4.38324e-10	3.76273e-10	3.93229e-10	4.71439e-10	1.12659e-09	8.94786e-10	4.89733e-10	5.68583e-10	5.66058e-10
24	9.61007e-10	7.45563e-10	2.15068e-10	2.81813e-10	4.10635e-10	3.35742e-10	1.84477e-10	2.50621e-10	3.20547e-11	3.60212e-10	2.8795e-10	2.16287e-10	2.87782e-10	8.75672e-10	6.59466e-10	2.7304e-10	3.46696e-10	3.95534e-10
25	1.12035e-07	1.07864e-07	1.11761e-07	1.05366e-07	1.43634e-07	1.46816e-07	1.31041e-07	1.22877e-07	1.58047e-07	1.49567e-07	1.53032e-07	1.25311e-07	1.1784e-07	1.25081e-07	1.19937e-07	1.00779e-07	9.55766e-08	1.25092e-07
26	0.347688	0.335283	0.349243	0.329014	0.448394	0.458553	0.4097	0.383926	0.49472	0.467121	0.478156	0.391664	0.368044	0.388777	0.373332	0.31469	0.29817	0.390381
27	0.107053	0.103234	0.115033	0.10837	0.0477752	0.0488575	0.0689911	0.0646508	0.00148511	0.0497705	0.0509462	0.0659539	0.0619764	0.119705	0.114949	0.103652	0.0982111	0.0782715
28	1.08623e-09	9.30547e-10	6.77423e-10	8.39464e-10	6.4429e-10	5.62068e-10	6.76642e-10	8.53308e-10	5.43495e-10	6.14725e-10	5.36185e-10	7.07874e-10	8.87179e-10	1.02636e-09	8.79393e-10	7.27909e-10	8.91279e-10	7.69669e-10
29	0.166402	0.160465	0.0666651	0.0628035	0.0699147	0.0714986	0.047876	0.0448641	0.0014849	0.0310706	0.0318046	0.0897914	0.0843762	0.0678884	0.0651915	0.159007	0.15066	0.080692
30	1.08696e-07	1.05686e-07	1.08247e-07	1.03472e-07	6.16219e-08	6.08831e-08	5.56859e-08	5.08258e-08	2.25875e-09	6.41081e-08	6.34252e-08	5.32518e-08	4.87652e-08	1.21352e-07	1.17549e-07	9.76087e-08	9.38811e-08	7.74893e-08
31	9.92655e-10	7.45027e-10	1.61475e-10	2.53156e-10	4.11206e-10	3.17299e-10	1.39132e-10	2.35717e-10	1.46753e-11	3.64517e-10	2.74276e-10	1.7186e-10	2.72159e-10	9.21316e-10	6.68066e-10	2.21844e-10	3.17451e-10	3.81284e-10
32	4.65947e-09	4.09462e-09	3.60275e-09	3.60894e-09	8.46962e-08	8.64355e-08	7.70977e-08	7.24954e-08	1.58233e-07	8.81159e-08	9.00754e-08	7.37788e-08	6.96197e-08	4.85917e-09	4.32914e-09	3.39137e-09	3.49341e-09	4.89757e-08
33	0.00201345	0.00194162	0.00202238	0.00190523	0.0505309	0.0516757	0.0461701	0.0432656	0.0950051	0.0526412	0.0538848	0.0441376	0.0414757	0.00225137	0.00216194	0.00182227	0.00172661	0.029096
34	0.107001	0.103183	0.114975	0.108315	0.047752	0.0488338	0.0689556	0.0646176	0.00148423	0.0497463	0.0509215	0.06592	0.0619445	0.119646	0.114893	0.103599	0.0981609	0.0782322
35	0.0647504	0.0624403	0.0650447	0.061277	0.0355744	0.0363803	0.032508	0.0304629	3.8674e-10	0.0370601	0.0379356	0.0310769	0.0292027	0.0724025	0.0695262	0.0586093	0.0555326	0.0458696
36	2.64646e-09	2.33472e-09	1.81748e-09	1.81941e-09	2.47203e-09	2.4397e-09	2.05751e-09	2.04005e-09	2.27871e-09	2.50937e-09	2.48264e-09	2.01757e-09	2.01573e-09	2.75337e-09	2.42733e-09	1.73592e-09	1.76218e-09	2.21236e-09
37	0.0667638	0.0643818	0.0670625	0.063178	0.0861017	0.0880523	0.0786716	0.0737224	0.0949974	0.0896976	0.0918166	0.0752083	0.0706726	0.0746538	0.0716881	0.0604275	0.0572554	0.0749619
